# Supplementary material for: Hydrothermal treatment of colloids induced via liquid-phase laser ablation: a new approach for hierarchical titanate nanostructures with enhanced photodegradation performance
Source: Royal Society of Chemistry journal article supplement (doi:10.1039/c1ce05136a), 2011-01-01
Supplement: c1ce05136a.pdf [file c1ce05136a.pdf]

Supporting Information

**Hydrothermal Treatment of the Colloids Induced via  
Liquid-Phase Laser Ablation: A New Approach for Hierarchical  
Titanate Nanostructures with Enhanced Photodegradation  
Performance**

*Hemin Zhang, Changhao Liang,\* Zhenfei Tian, Jun Liu, Weiping Cai*

Key Laboratory of Materials Physics and Anhui Key Laboratory of Nanomaterials  
and Nanotechnology, Institute of Solid State Physics, Hefei Institutes of Physical  
Science, Chinese Academy of Sciences, Hefei, 230031, China.

\*Corresponding Author: Telephone: +86-551-5591129; Fax: +86-551-5591434.  
E-mail: [chliang@issp.ac.cn](mailto:chliang@issp.ac.cn).

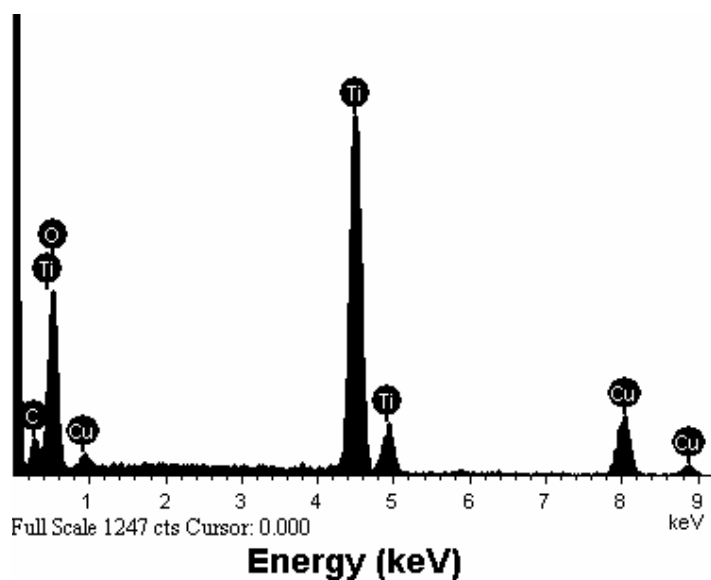

| Elements | Peak Area | Area Sigma | k Factor | Abs correction | Weight % | Weight % Sigma | Atom % |
|----------|-----------|------------|----------|----------------|----------|----------------|--------|
| O K      | 3204      | 135        | 1.547    | 1.000          | 31.35    | 0.96           | 57.76  |
| Ti K     | 12102     | 187        | 0.897    | 1.000          | 68.65    | 0.96           | 42.24  |
| Totals   |           |            |          |                | 100.00   |                |        |

**Fig. S1** EDX spectrum of Titania species and the Table of corresponding Elements analysis.

From EDX analysis, there are only Ti and O signals except the Cu and C signals which originate from the carbon-coated copper grid. From the Table of elemental microscopic analysis, the molar ratio of Ti/O is around **2:1**. So, the amorphous species can be described as  $\text{TiO}_2$ .

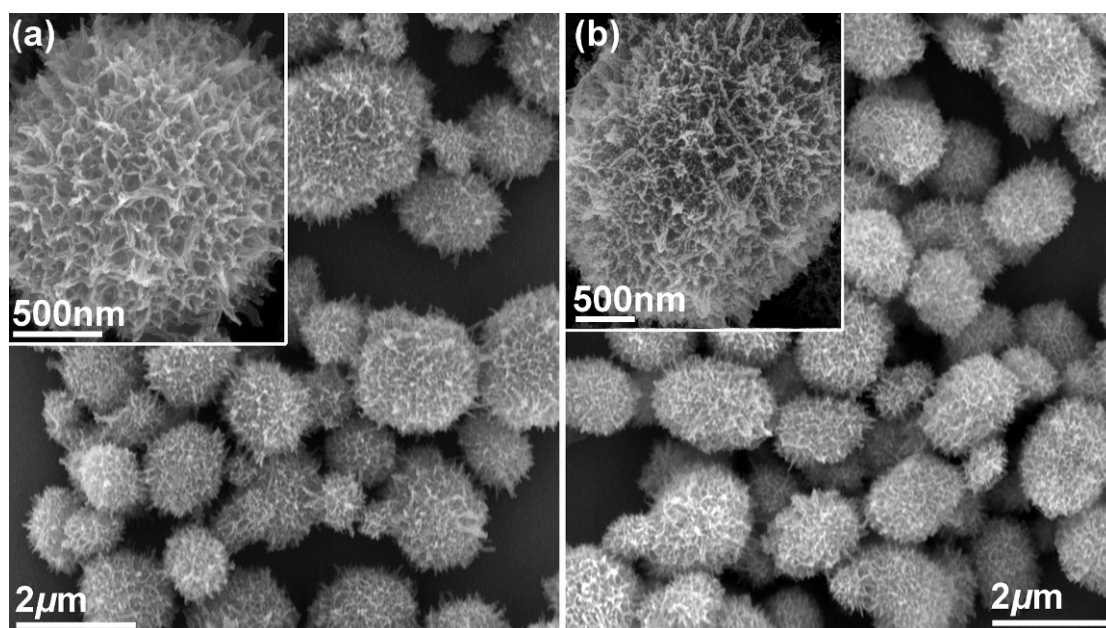

**Fig. S2** FE-SEM images of hierarchical spheres by hydrothermal treating of LAL-induced colloidal solutions using rotated Ti target with different duration time. (a) 72 h, (b) 96 h.

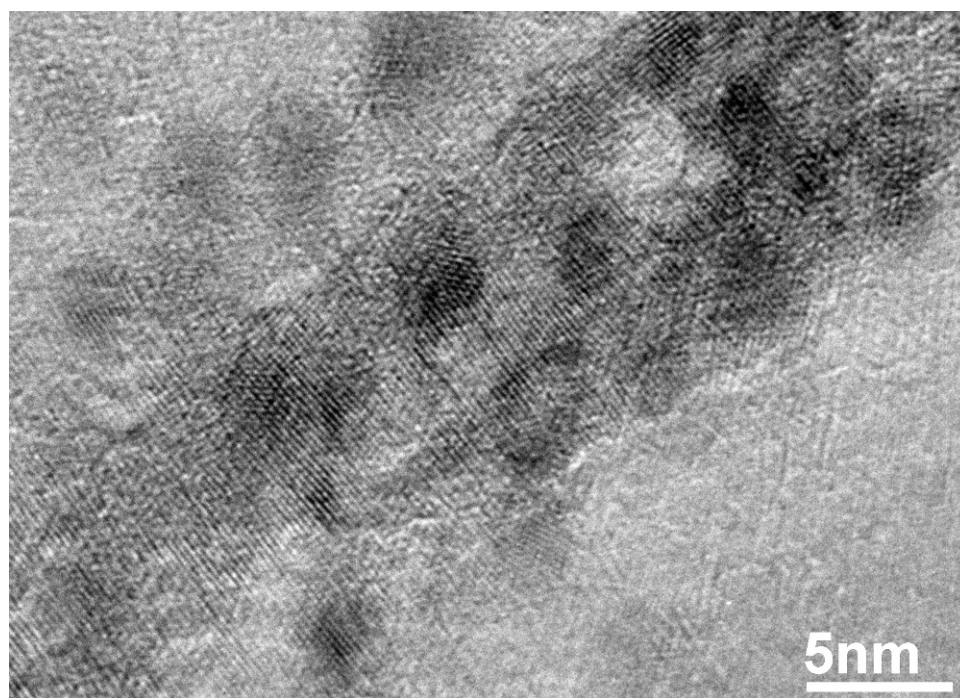

**Fig. S3** HRTEM image of stripe-like structure with nanoparticles oriented attachment.

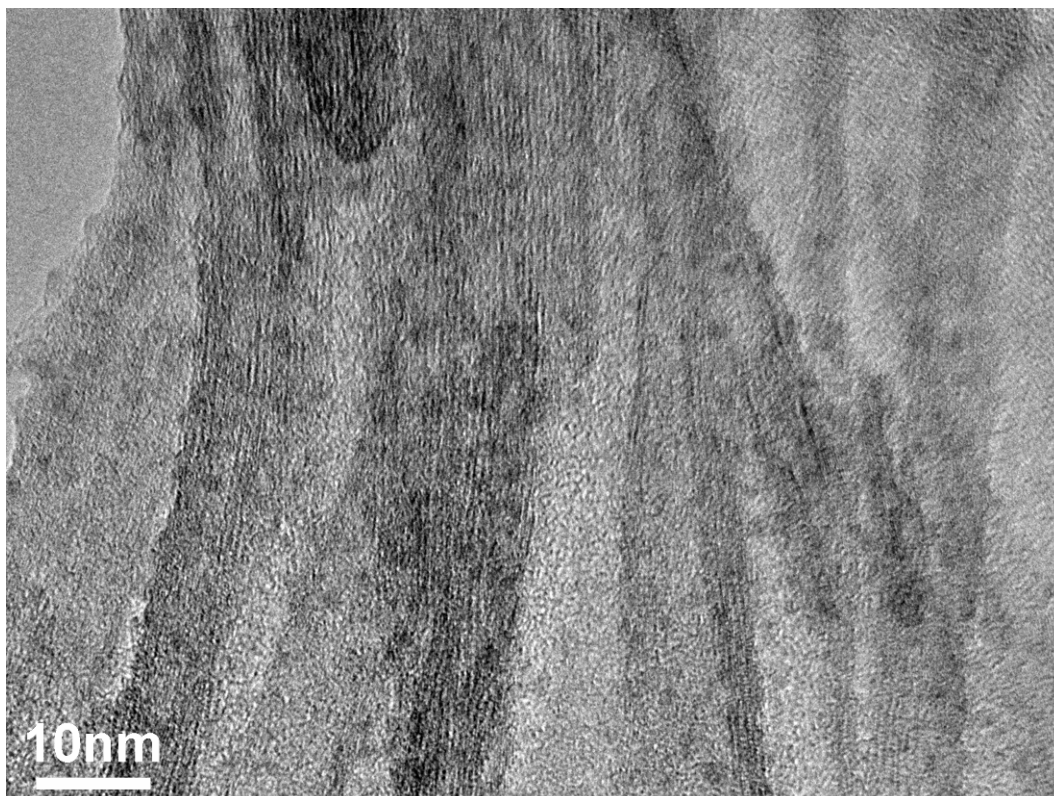

**Fig. S4** HRTEM image of several nanostripes attached from each other.

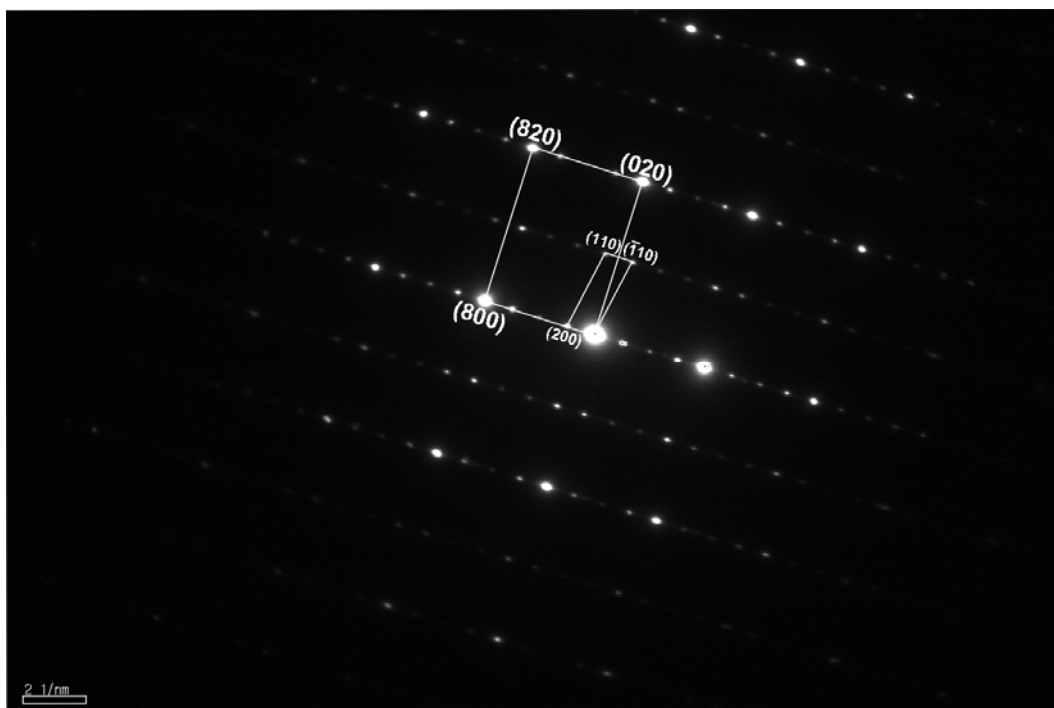

**Fig. S5** SAED analysis of corresponding sample in Fig.5h.

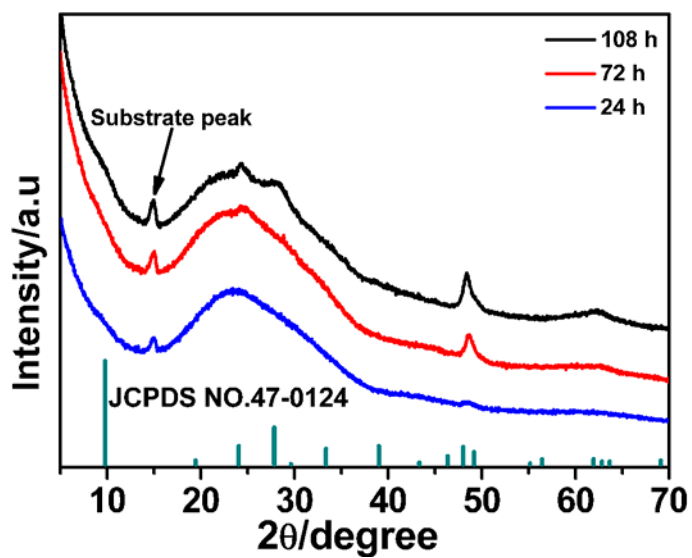

**Fig. S6** XRD patterns for titanate structures with different hydrothermal duration time using the fixed target.

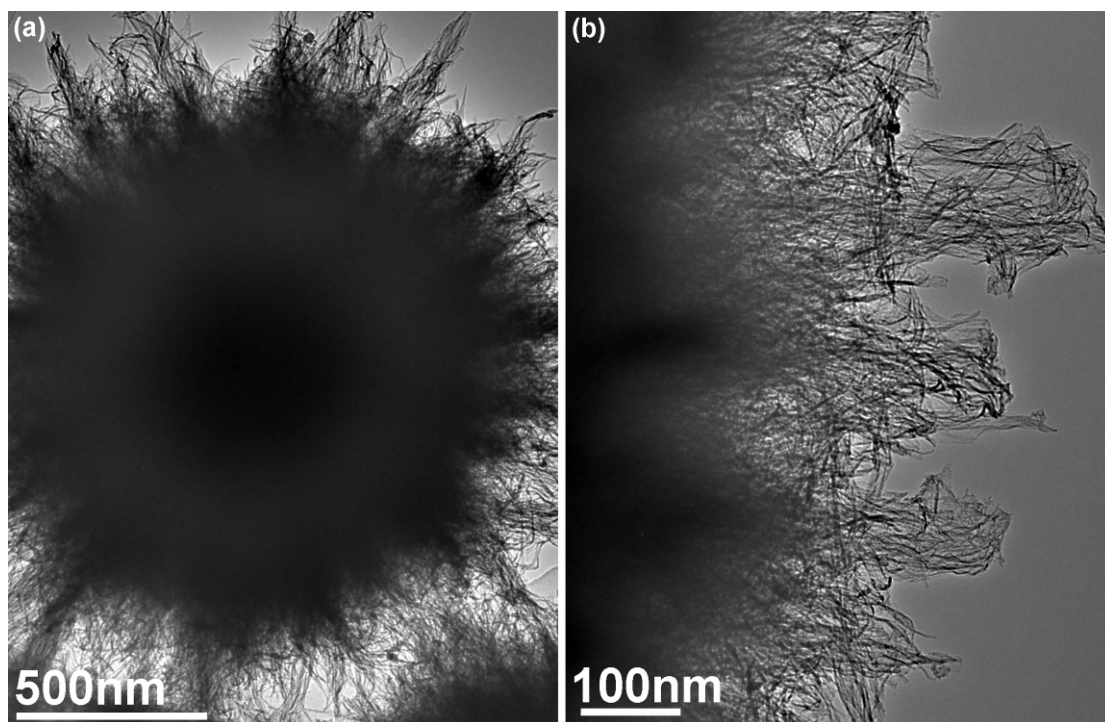

**Fig. S7** TEM images of hierarchical spheres synthesized by rotating Ti target for 48 h hydrothermal time.

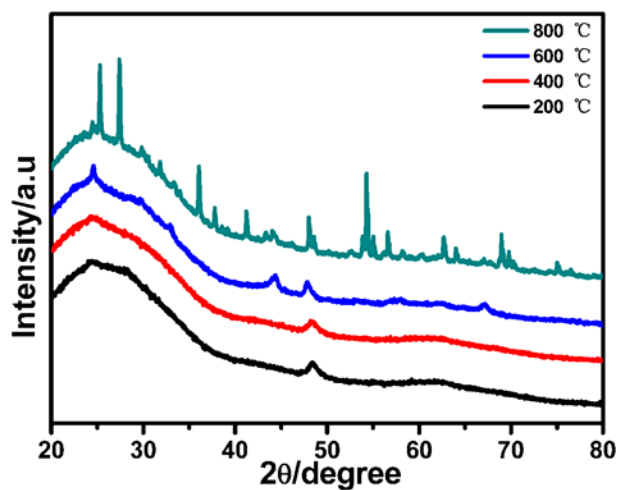

**Fig. S8** XRD patterns for different annealing temperature using the rotated target at duration time of 48 h.

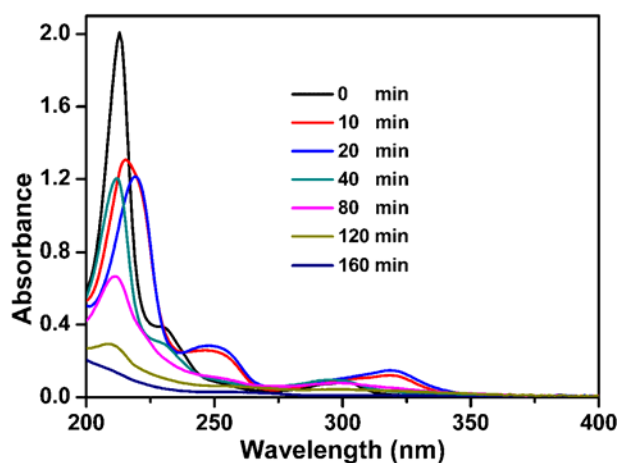

**Figure. S9** UV-vis absorption spectra depicting photocatalytic degradation of PCP by calcined titanate spheres.

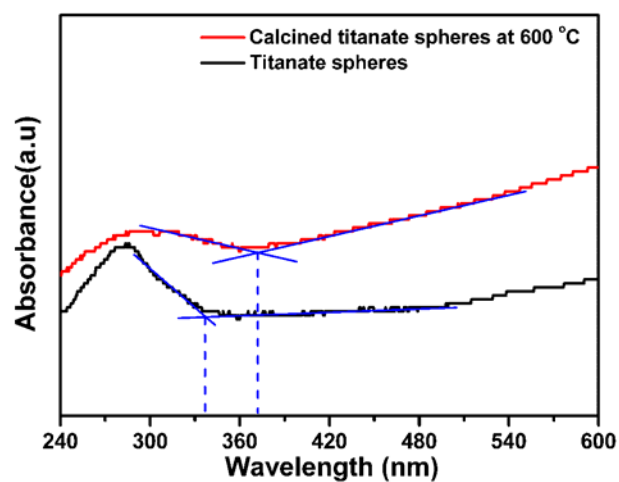

**Fig. S10** UV-vis absorption spectra of titanate spheres and calcined titanate spheres at 600 °C.
